# Supplementary material for: Modeling a Dynamic Printability Window on Polysaccharide Blend Inks for Extrusion Bioprinting
Source: PubMed Central journal article supplement (PMC10015426; doi:10.1021/acsbiomaterials.2c01143), 2023-02-27
Supplement: ab2c01143_si_002.pdf [file ab2c01143_si_002.pdf]

# Supplementary Information: Modelling a dynamic printability window on polysaccharides blend inks for extrusion bioprinting

Francesca Perin and Eugenia Spessot, Anna Famà, Alessio Bucciarelli, Emanuela Callone, Carlos Mota, Antonella Motta and Devid Maniglio

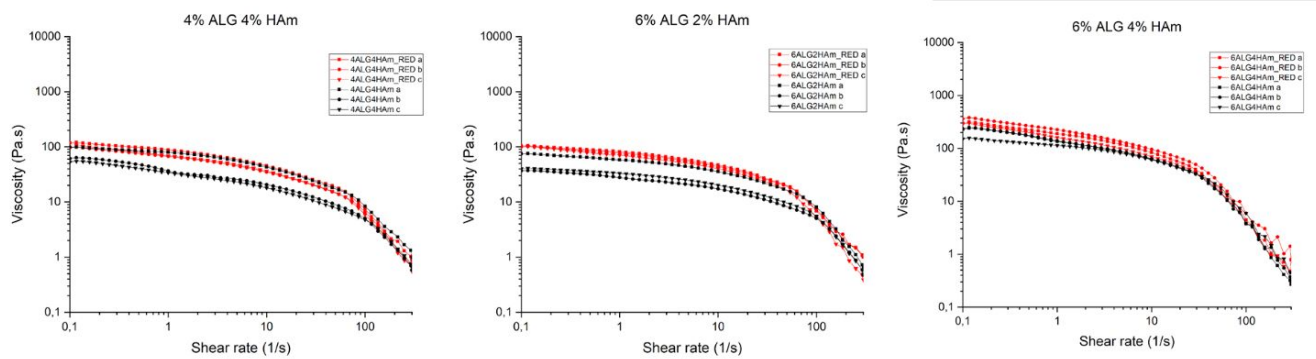

**Figure. S1** Comparison of the viscosity measurements with and without red dye for conditions 4ALG4HA, 6ALG2HA and 6ALG4HA.

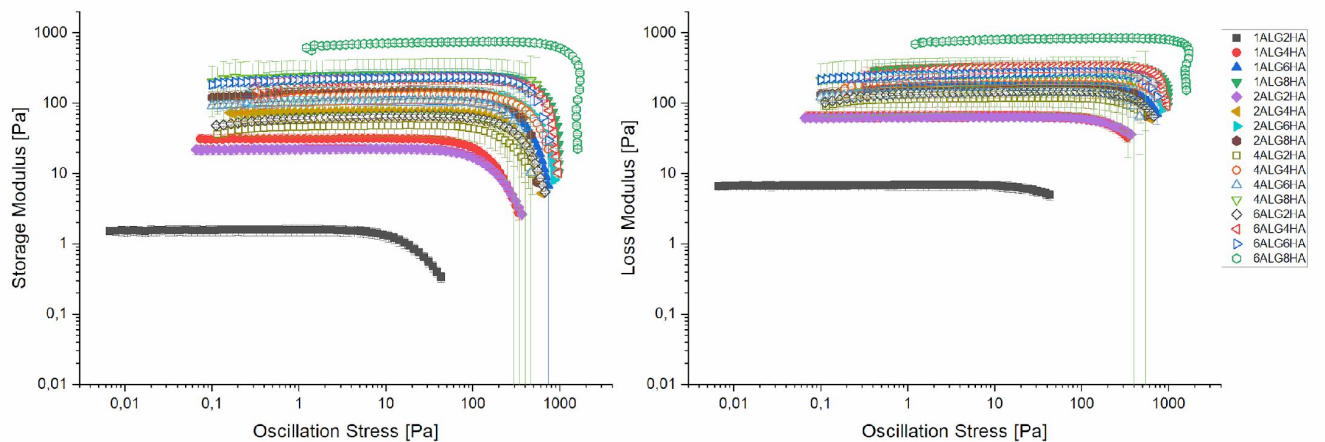

**Figure. S2** Storage and loss moduli for all the tested blends. The curves are reported as the average of the three replicates for each condition with standard deviation.

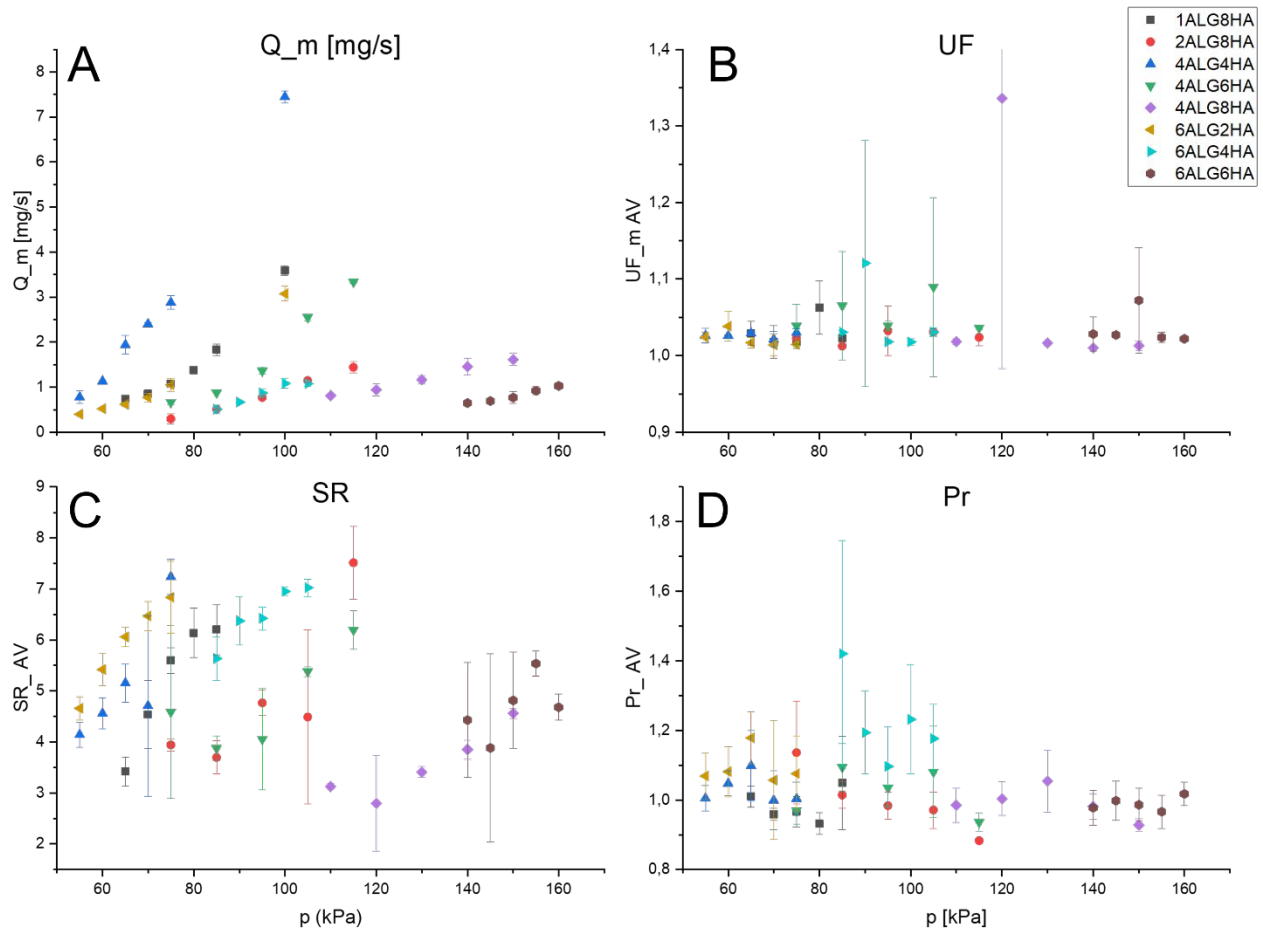

**Figure. S3** A: Average mass flow rate of the tested concentrations as function of the extrusion pressure, B: Uniformity ratio of the tested concentrations as function of the extrusion pressure, C: Spreading ratio of the tested concentrations as function of the extrusion pressure, D: Printability Index of the tested concentrations as function of the extrusion pressure.

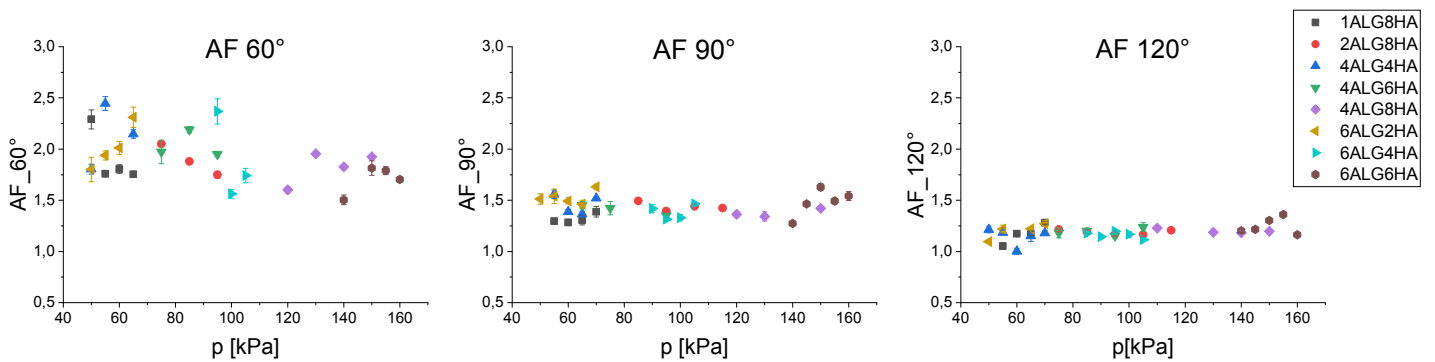

**Figure. S4** Angle fidelity factor of the tested concentrations at different angles (60°, 90°, 120°) as a function of the printing pressure.

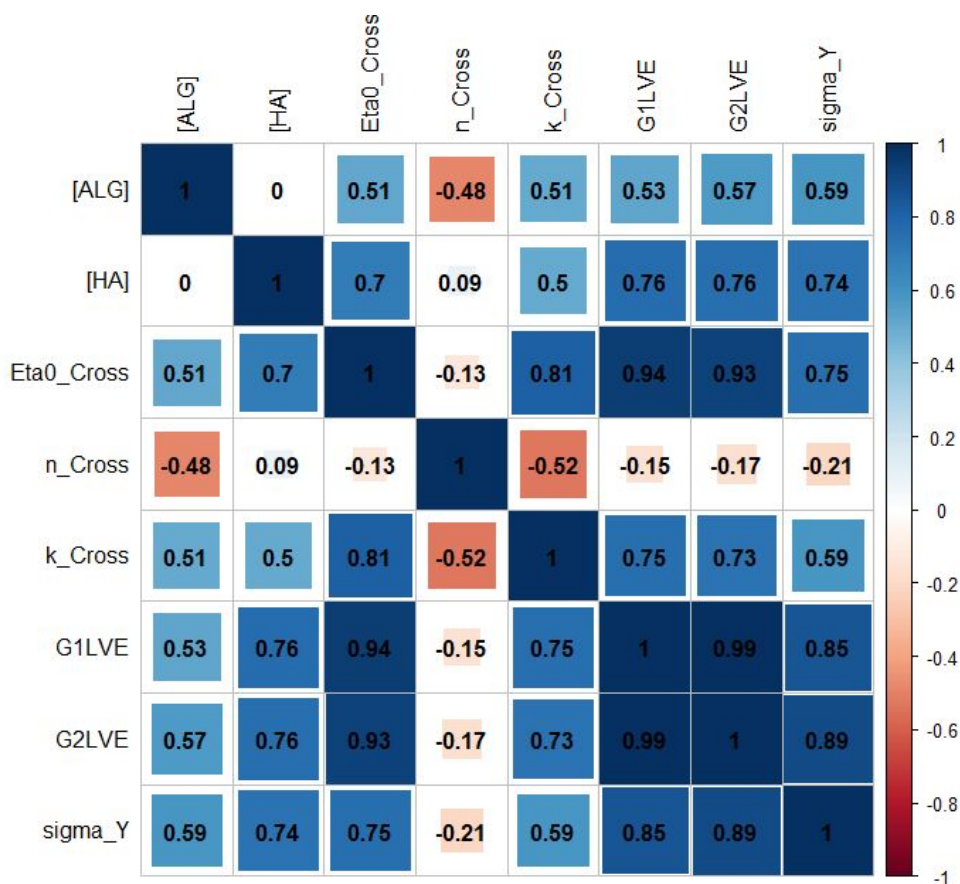

**Figure. S5** Correlation Matrix of the dataset, value below 0.3 or above -0.3 indicates a non significant linear correlation between the considered couple of variables.

| N  | Factor 1       | Factor 2      | Response 1       | Response 2 | Response 3 | Response 4   | Response 5    | Response 6     |
|----|----------------|---------------|------------------|------------|------------|--------------|---------------|----------------|
|    | A:Alg<br>mg/mL | B:HA<br>mg/mL | $\eta_0$<br>Pa*s | m          | k<br>s     | G' LVE<br>Pa | G'' LVE<br>Pa | $\tau_Y$<br>Pa |
| 1  | 10             | 80            | 182.904          | 0.766497   | 0.278983   | 198.142      | 256.716       | 611.629        |
| 2  | 10             | 80            | 217.307          | 0.767669   | 0.324032   | 309.828      | 403.094       | 534.135        |
| 3  | 10             | 80            | 234.41           | 0.80038    | 0.331158   | 275.958      | 359.134       | 565.15         |
| 4  | 20             | 80            | 299.799          | 0.81071    | 0.365788   | 348.512      | 453.378       | 522.956        |
| 5  | 20             | 80            | 282.775          | 0.746452   | 0.45178    | 366.736      | 465.446       | 490.018        |
| 6  | 20             | 80            | 317.925          | 0.653762   | 0.85776    | 351.511      | 449.834       | 528.521        |
| 7  | 40             | 40            | 76.477           | 0.464118   | 1.41845    | 58.2717      | 102.764       | 232.268        |
| 8  | 40             | 40            | 119.324          | 0.560052   | 0.481202   | 154.97       | 268.387       | 597.288        |
| 9  | 40             | 40            | 99.7334          | 0.740178   | 0.149962   | 152.103      | 256.375       | 509.356        |
| 10 | 40             | 60            | 303.234          | 0.685191   | 0.457944   | 332.033      | 469.823       | 524.477        |
| 11 | 40             | 60            | 298.463          | 0.712753   | 0.457501   | 350.419      | 491.155       | 545.868        |
| 12 | 40             | 60            | 245.419          | 0.481116   | 0.985485   | 349.103      | 480.041       | 601.69         |
| 13 | 40             | 80            | 429.922          | 0.807125   | 0.533299   | 481.729      | 584.872       | 551.896        |
| 14 | 40             | 80            | 627.275          | 0.868908   | 0.592477   | 485.604      | 582.931       | 562.351        |
| 15 | 40             | 80            | 720.634          | 0.820207   | 0.891118   | 462.978      | 563.69        | 589.076        |
| 16 | 60             | 20            | 42.4777          | 0.619607   | 0.123291   | 67.8291      | 151.783       | 344.064        |
| 17 | 60             | 20            | 43.6288          | 0.482242   | 0.2706     | 71.4151      | 159.942       | 377.903        |
| 18 | 60             | 20            | 79.5261          | 0.587807   | 0.156502   | 69.5039      | 157.687       | 319.316        |

|    |    |    |         |          |           |         |         |         |
|----|----|----|---------|----------|-----------|---------|---------|---------|
| 19 | 60 | 40 | 309.773 | 0.579064 | 1.21938   | 282.158 | 409.129 | 579.767 |
| 20 | 60 | 40 | 272.174 | 0.619333 | 0.783726  | 220.196 | 342.292 | 527.459 |
| 21 | 60 | 40 | 154.963 | 0.705315 | 0.20098   | 215.685 | 305.333 | 550.613 |
| 22 | 60 | 60 | 368.777 | 0.876524 | 0.321061  | 409.564 | 548.005 | 728.99  |
| 23 | 60 | 60 | 461.591 | 0.874637 | 0.399713  | 465.543 | 618.049 | 812.845 |
| 24 | 60 | 60 | 500.218 | 0.832547 | 0.55101   | 583.156 | 731.616 | 740.711 |
| 25 | 10 | 40 | 17.3976 | 0.81582  | 0.102216  | 25.4874 | 55.5448 | 89.938  |
| 26 | 10 | 40 | 10.7996 | 0.752467 | 0.0978945 | 32.9381 | 73.0738 | 101.116 |
| 27 | 10 | 40 | 27.5373 | 0.994333 | 0.113069  | 36.3581 | 75.9214 | 134.286 |
| 28 | 10 | 60 | 85.4876 | 0.798231 | 0.162716  | 102.919 | 182.826 | 345.995 |
| 29 | 10 | 60 | 125.104 | 0.827367 | 0.196981  | 126.577 | 212.279 | 386.637 |
| 30 | 10 | 60 | 105.464 | 0.88239  | 0.204083  | 94.8642 | 159.559 | 274.288 |
| 31 | 10 | 20 | 1.07972 | 0.792742 | 0.0163589 | 1.24531 | 5.61121 | 9.23615 |
| 32 | 10 | 20 | 1.65765 | 0.816741 | 0.013645  | 1.7431  | 7.58322 | 11.2769 |
| 33 | 10 | 20 | 2.28101 | 0.788162 | 0.0213297 | 1.69927 | 7.42938 | 12.3149 |
| 34 | 20 | 20 | 9.50184 | 0.759762 | 0.0219009 | 19.6786 | 58.5346 | 133.526 |
| 35 | 20 | 20 | 11.134  | 0.699697 | 0.0262325 | 23.4917 | 67.7755 | 111.419 |
| 36 | 20 | 20 | 10.8441 | 0.73763  | 0.0335717 | 26.3829 | 73.3926 | 124.915 |
| 37 | 20 | 40 | 37.8958 | 0.74955  | 0.0779691 | 60.0132 | 129.265 | 182.209 |
| 38 | 20 | 40 | 47.0283 | 0.87239  | 0.0758585 | 99.3036 | 174.63  | 327.126 |
| 39 | 20 | 40 | 64.6457 | 0.952439 | 0.0880795 | 72.2622 | 141.713 | 280.449 |
| 40 | 20 | 60 | 75.8155 | 0.759901 | 0.140666  | 162.319 | 250.989 | 489.131 |
| 41 | 20 | 60 | 47.9806 | 0.674053 | 0.160979  | 152.2   | 241.348 | 471.587 |
| 42 | 20 | 60 | 64.008  | 0.847363 | 0.10613   | 113.531 | 186.94  | 419.588 |
| 43 | 40 | 20 | 22.294  | 0.728743 | 0.0501603 | 35.3013 | 90.6707 | 199.702 |
| 44 | 40 | 20 | 30.7534 | 0.832004 | 0.0482187 | 68.4632 | 160.751 | 263.201 |
| 45 | 40 | 20 | 27.6872 | 0.789437 | 0.046825  | 45.8701 | 116.279 | 200.105 |
| 46 | 60 | 80 | 520.664 | 0.616021 | 1.03433   | 799.781 | 888.443 | 841.719 |
| 47 | 60 | 80 | 960.43  | 0.627027 | 1.83225   | 799.883 | 892.56  | 737.281 |
| 48 | 60 | 80 | 1005.04 | 0.577041 | 2.30706   | 798.437 | 880.267 | 725.137 |

**Table. S1** Data set used to fit the empirical model of the rheological properties.

| Run | Factor 1<br>A:Alg<br>mg/mL | Factor 2<br>B:HA<br>mg/mL | Factor 3<br>C:P<br>kPa | Response 1<br>Pr mean | Response 2<br>Pr StD | Response 5<br>Qm mean | Response 6<br>Qm StD | Response 7<br>SR mean | Response 8<br>SR StD |
|-----|----------------------------|---------------------------|------------------------|-----------------------|----------------------|-----------------------|----------------------|-----------------------|----------------------|
| 1   | 10                         | 80                        | 65                     | 1.010                 | 0.029                | 0.735                 | 0.019                | 3.422                 | 0.283                |
| 2   | 10                         | 80                        | 70                     | 0.959                 | 0.017                | 0.851                 | 0.019                | 4.538                 | 0.669                |
| 3   | 10                         | 80                        | 75                     | 0.967                 | 0.042                | 1.074                 | 0.018                | 5.597                 | 0.247                |
| 4   | 10                         | 80                        | 80                     | 0.932                 | 0.030                | 1.375                 | 0.068                | 6.138                 | 0.485                |
| 5   | 10                         | 80                        | 85                     | 1.049                 | 0.130                | 1.834                 | 0.103                | 6.203                 | 0.490                |
| 6   | 10                         | 80                        | 100                    |                       |                      | 3.589                 | 0.089                |                       |                      |
| 7   | 20                         | 80                        | 75                     | 1.136                 | 0.143                | 0.293                 | 0.095                | 3.943                 | 0.124                |
| 8   | 20                         | 80                        | 85                     | 1.014                 | 0.037                | 0.507                 | 0.011                | 3.697                 | 0.329                |
| 9   | 20                         | 80                        | 95                     | 0.984                 | 0.038                | 0.767                 | 0.034                | 4.767                 | 0.248                |
| 10  | 20                         | 80                        | 105                    | 0.971                 | 0.051                | 1.144                 | 0.027                | 4.490                 | 1.711                |
| 11  | 20                         | 80                        | 115                    | 0.883                 | 0.002                | 1.438                 | 0.102                | 7.511                 | 0.716                |

|    |    |    |     |       |       |       |       |       |       |
|----|----|----|-----|-------|-------|-------|-------|-------|-------|
| 12 | 40 | 40 | 55  | 1.005 | 0.035 | 0.778 | 0.112 | 4.142 | 0.245 |
| 13 | 40 | 40 | 60  | 1.048 | 0.034 | 1.134 | 0.006 | 4.559 | 0.305 |
| 14 | 40 | 40 | 65  | 1.098 | 0.099 | 1.797 | 0.171 | 5.156 | 0.373 |
| 15 | 40 | 40 | 70  | 0.999 | 0.081 | 2.403 | 0.028 | 4.706 | 1.769 |
| 16 | 40 | 40 | 75  | 1.004 | 0.045 | 2.881 | 0.125 | 7.238 | 0.350 |
| 17 | 40 | 40 | 100 |       |       | 7.447 | 0.105 |       |       |
| 18 | 40 | 60 | 75  | 0.969 | 0.038 | 0.658 | 0.040 | 4.586 | 1.698 |
| 19 | 40 | 60 | 85  | 1.094 | 0.066 | 0.874 | 0.010 | 3.873 | 0.245 |
| 20 | 40 | 60 | 95  | 1.034 | 0.055 | 1.363 | 0.065 | 4.056 | 0.990 |
| 21 | 40 | 60 | 105 | 1.081 | 0.127 | 2.547 | 0.056 | 5.379 | 0.098 |
| 22 | 40 | 60 | 115 | 0.936 | 0.025 | 3.336 | 0.021 | 6.194 | 0.384 |
| 23 | 40 | 80 | 110 | 0.985 | 0.048 | 0.811 | 0.039 | 3.129 | 0.062 |
| 24 | 40 | 80 | 120 | 1.004 | 0.047 | 0.942 | 0.112 | 2.796 | 0.937 |
| 25 | 40 | 80 | 130 | 1.054 | 0.086 | 1.163 | 0.069 | 3.413 | 0.107 |
| 26 | 40 | 80 | 140 | 0.981 | 0.035 | 1.450 | 0.150 | 3.850 | 0.185 |
| 27 | 40 | 80 | 150 | 0.928 | 0.018 | 1.616 | 0.106 | 4.560 | 0.102 |
| 28 | 60 | 20 | 55  | 1.069 | 0.065 | 0.395 | 0.014 | 4.657 | 0.233 |
| 29 | 60 | 20 | 60  | 1.081 | 0.071 | 0.522 | 0.007 | 5.419 | 0.322 |
| 30 | 60 | 20 | 65  | 1.179 | 0.072 | 0.612 | 0.043 | 6.059 | 0.189 |
| 31 | 60 | 20 | 70  | 1.057 | 0.164 | 0.769 | 0.075 | 6.469 | 0.286 |
| 32 | 60 | 20 | 75  | 1.076 | 0.096 | 1.048 | 0.122 | 6.838 | 0.704 |
| 33 | 60 | 20 | 100 |       |       | 3.074 | 0.138 |       |       |
| 34 | 60 | 40 | 85  | 1.420 | 0.309 | 0.506 | 0.078 | 5.633 | 0.427 |
| 35 | 60 | 40 | 90  | 1.194 | 0.116 | 0.665 | 0.008 | 6.376 | 0.475 |
| 36 | 60 | 40 | 95  | 1.097 | 0.111 | 0.871 | 0.070 | 6.424 | 0.229 |
| 37 | 60 | 40 | 100 | 1.232 | 0.153 | 1.084 | 0.089 | 6.955 | 0.077 |
| 38 | 60 | 40 | 105 | 1.177 | 0.095 | 1.076 | 0.055 | 7.023 | 0.173 |
| 39 | 60 | 60 | 140 | 0.978 | 0.049 | 0.644 | 0.055 | 4.431 | 1.127 |
| 40 | 60 | 60 | 145 | 0.998 | 0.055 | 0.689 | 0.048 | 3.885 | 1.844 |
| 41 | 60 | 60 | 150 | 0.986 | 0.045 | 0.768 | 0.105 | 4.816 | 0.948 |
| 42 | 60 | 60 | 155 | 0.966 | 0.046 | 0.918 | 0.075 | 5.536 | 0.247 |
| 43 | 60 | 60 | 160 | 1.017 | 0.032 | 1.027 | 0.057 | 4.683 | 0.258 |

**Table. S2** Data set used to fit the empirical model of the 2D printing yields (Pr, Qm and SR)

| <b>Run</b> | <b>Factor 1<br/>A:Alg<br/>mg/mL</b> | <b>Factor 2<br/>B:HA<br/>mg/mL</b> | <b>Factor 3<br/>C:P<br/>kPa</b> | <b>Factor 4<br/>D:Angle<br/>°</b> | <b>Response 1<br/>mean AF</b> | <b>Response 2<br/>StD AF</b> |
|------------|-------------------------------------|------------------------------------|---------------------------------|-----------------------------------|-------------------------------|------------------------------|
| 1          | 10                                  | 80                                 | 50                              | 60                                | 2.29017                       | 0.0936253                    |
| 2          | 10                                  | 80                                 | 55                              | 60                                | 1.7596                        | 0.0301965                    |
| 3          | 10                                  | 80                                 | 60                              | 60                                | 1.80526                       | 0.0412513                    |
| 4          | 10                                  | 80                                 | 55                              | 90                                | 1.29597                       | 0.0210961                    |
| 5          | 10                                  | 80                                 | 65                              | 60                                | 1.75407                       | 0.0158443                    |
| 6          | 10                                  | 80                                 | 60                              | 90                                | 1.28243                       | 0.029433                     |
| 7          | 10                                  | 80                                 | 65                              | 90                                | 1.30412                       | 0.0453863                    |
| 8          | 10                                  | 80                                 | 70                              | 90                                | 1.38795                       | 0.0513345                    |

|    |    |    |     |     |         |            |
|----|----|----|-----|-----|---------|------------|
| 9  | 10 | 80 | 55  | 120 | 1.05256 | 0.0295853  |
| 10 | 10 | 80 | 60  | 120 | 1.17187 | 0.022162   |
| 11 | 10 | 80 | 65  | 120 | 1.17573 | 0.0194448  |
| 12 | 10 | 80 | 70  | 120 | 1.28156 | 0.0144789  |
| 13 | 20 | 80 | 75  | 60  | 2.04975 | 0.016115   |
| 14 | 20 | 80 | 85  | 60  | 1.87831 | 0.0167196  |
| 15 | 20 | 80 | 95  | 60  | 1.74885 | 0.0334194  |
| 16 | 20 | 80 | 85  | 90  | 1.4926  | 0.0162292  |
| 17 | 20 | 80 | 95  | 90  | 1.39505 | 0.0125334  |
| 18 | 20 | 80 | 105 | 90  | 1.44103 | 0.00846958 |
| 19 | 20 | 80 | 115 | 90  | 1.42223 | 0.00551604 |
| 20 | 20 | 80 | 75  | 120 | 1.2125  | 0.0185018  |
| 21 | 20 | 80 | 85  | 120 | 1.19111 | 0.0182752  |
| 22 | 20 | 80 | 95  | 120 | 1.16533 | 0.0153714  |
| 23 | 20 | 80 | 105 | 120 | 1.16534 | 0.0191255  |
| 24 | 20 | 80 | 115 | 120 | 1.20579 | 0.0158535  |
| 25 | 40 | 40 | 50  | 60  | 1.80422 | 0.0482703  |
| 26 | 40 | 40 | 55  | 60  | 2.44505 | 0.0673524  |
| 27 | 40 | 40 | 65  | 60  | 2.14773 | 0.0410755  |
| 28 | 40 | 40 | 55  | 90  | 1.55854 | 0.0404212  |
| 29 | 40 | 40 | 60  | 90  | 1.38725 | 0.0237332  |
| 30 | 40 | 40 | 65  | 90  | 1.36564 | 0.0275376  |
| 31 | 40 | 40 | 70  | 90  | 1.52016 | 0.00885943 |
| 32 | 40 | 40 | 50  | 120 | 1.21458 | 0.031865   |
| 33 | 40 | 40 | 55  | 120 | 1.18475 | 0.0251478  |
| 34 | 40 | 40 | 60  | 120 | 1.00068 | 0.028701   |
| 35 | 40 | 40 | 65  | 120 | 1.15143 | 0.053961   |
| 36 | 40 | 40 | 70  | 120 | 1.18045 | 0.020291   |
| 37 | 40 | 60 | 75  | 60  | 1.97211 | 0.115179   |
| 38 | 40 | 60 | 85  | 60  | 2.18925 | 0.0312527  |
| 39 | 40 | 60 | 95  | 60  | 1.94988 | 0.0269887  |
| 40 | 40 | 60 | 65  | 90  | 1.45212 | 0.0365994  |
| 41 | 40 | 60 | 75  | 90  | 1.42363 | 0.0644926  |
| 42 | 40 | 60 | 95  | 90  | 1.35048 | 0.0178555  |
| 43 | 40 | 60 | 105 | 120 | 1.23805 | 0.0418633  |
| 44 | 40 | 60 | 75  | 120 | 1.18126 | 0.0479477  |
| 45 | 40 | 60 | 85  | 120 | 1.20002 | 0.0268969  |
| 46 | 40 | 60 | 95  | 120 | 1.15453 | 0.0215345  |
| 47 | 40 | 80 | 120 | 60  | 1.60113 | 0.0298627  |
| 48 | 40 | 80 | 130 | 60  | 1.95358 | 0.0216747  |
| 49 | 40 | 80 | 140 | 60  | 1.82522 | 0.0133087  |
| 50 | 40 | 80 | 150 | 60  | 1.92546 | 0.0219518  |
| 51 | 40 | 80 | 120 | 90  | 1.36288 | 0.0282561  |
| 52 | 40 | 80 | 130 | 90  | 1.34172 | 0.0445454  |
| 53 | 40 | 80 | 150 | 90  | 1.42105 | 0.0145608  |
| 54 | 40 | 80 | 110 | 120 | 1.22687 | 0.0203316  |

|    |    |    |     |     |         |            |
|----|----|----|-----|-----|---------|------------|
| 55 | 40 | 80 | 130 | 120 | 1.18756 | 0.0206974  |
| 56 | 40 | 80 | 140 | 120 | 1.18237 | 0.0173148  |
| 57 | 40 | 80 | 150 | 120 | 1.19584 | 0.0204479  |
| 58 | 60 | 20 | 50  | 60  | 1.80075 | 0.120007   |
| 59 | 60 | 20 | 55  | 60  | 1.93806 | 0.0437234  |
| 60 | 60 | 20 | 60  | 60  | 2.0106  | 0.0630045  |
| 61 | 60 | 20 | 65  | 60  | 2.31133 | 0.0988328  |
| 62 | 60 | 20 | 50  | 90  | 1.5134  | 0.0504629  |
| 63 | 60 | 20 | 55  | 90  | 1.53985 | 0.0697319  |
| 64 | 60 | 20 | 60  | 90  | 1.49433 | 0.0310203  |
| 65 | 60 | 20 | 65  | 90  | 1.4624  | 0.0374672  |
| 66 | 60 | 20 | 70  | 90  | 1.62994 | 0.0274714  |
| 67 | 60 | 20 | 50  | 120 | 1.09488 | 0.0162623  |
| 68 | 60 | 20 | 55  | 120 | 1.21931 | 0.0365402  |
| 69 | 60 | 20 | 65  | 120 | 1.22121 | 0.00902439 |
| 70 | 60 | 20 | 70  | 120 | 1.27114 | 0.0290935  |
| 71 | 60 | 40 | 95  | 60  | 2.36855 | 0.123116   |
| 72 | 60 | 40 | 100 | 60  | 1.56292 | 0.0428463  |
| 73 | 60 | 40 | 105 | 60  | 1.7423  | 0.0698619  |
| 74 | 60 | 40 | 90  | 90  | 1.41795 | 0.0411236  |
| 75 | 60 | 40 | 95  | 90  | 1.31523 | 0.00945609 |
| 76 | 60 | 40 | 100 | 90  | 1.32876 | 0.0307992  |
| 77 | 60 | 40 | 105 | 90  | 1.46489 | 0.0155806  |
| 78 | 60 | 40 | 85  | 120 | 1.17845 | 0.0104487  |
| 79 | 60 | 40 | 90  | 120 | 1.14397 | 0.0103393  |
| 80 | 60 | 40 | 95  | 120 | 1.19772 | 0.0201288  |
| 81 | 60 | 40 | 100 | 120 | 1.16671 | 0.0273399  |
| 82 | 60 | 40 | 105 | 120 | 1.11558 | 0.0117484  |
| 83 | 60 | 60 | 140 | 60  | 1.50363 | 0.047354   |
| 84 | 60 | 60 | 150 | 60  | 1.81434 | 0.0715356  |
| 85 | 60 | 60 | 155 | 60  | 1.78987 | 0.0386035  |
| 86 | 60 | 60 | 160 | 60  | 1.70334 | 0.0283493  |
| 87 | 60 | 60 | 140 | 90  | 1.27302 | 0.0232889  |
| 88 | 60 | 60 | 145 | 90  | 1.4647  | 0.0146547  |
| 89 | 60 | 60 | 150 | 90  | 1.62833 | 0.0337752  |
| 90 | 60 | 60 | 155 | 90  | 1.49292 | 0.0278472  |
| 91 | 60 | 60 | 160 | 90  | 1.54228 | 0.0432433  |
| 92 | 60 | 60 | 140 | 120 | 1.20107 | 0.00993045 |
| 93 | 60 | 60 | 145 | 120 | 1.21688 | 0.0252817  |
| 94 | 60 | 60 | 150 | 120 | 1.30275 | 0.00780293 |
| 95 | 60 | 60 | 155 | 120 | 1.35987 | 0.0105086  |
| 96 | 60 | 60 | 160 | 120 | 1.16353 | 0.0154409  |

**Table. S3** Data set used to fit the model of the angular 2D printing yields (AF)

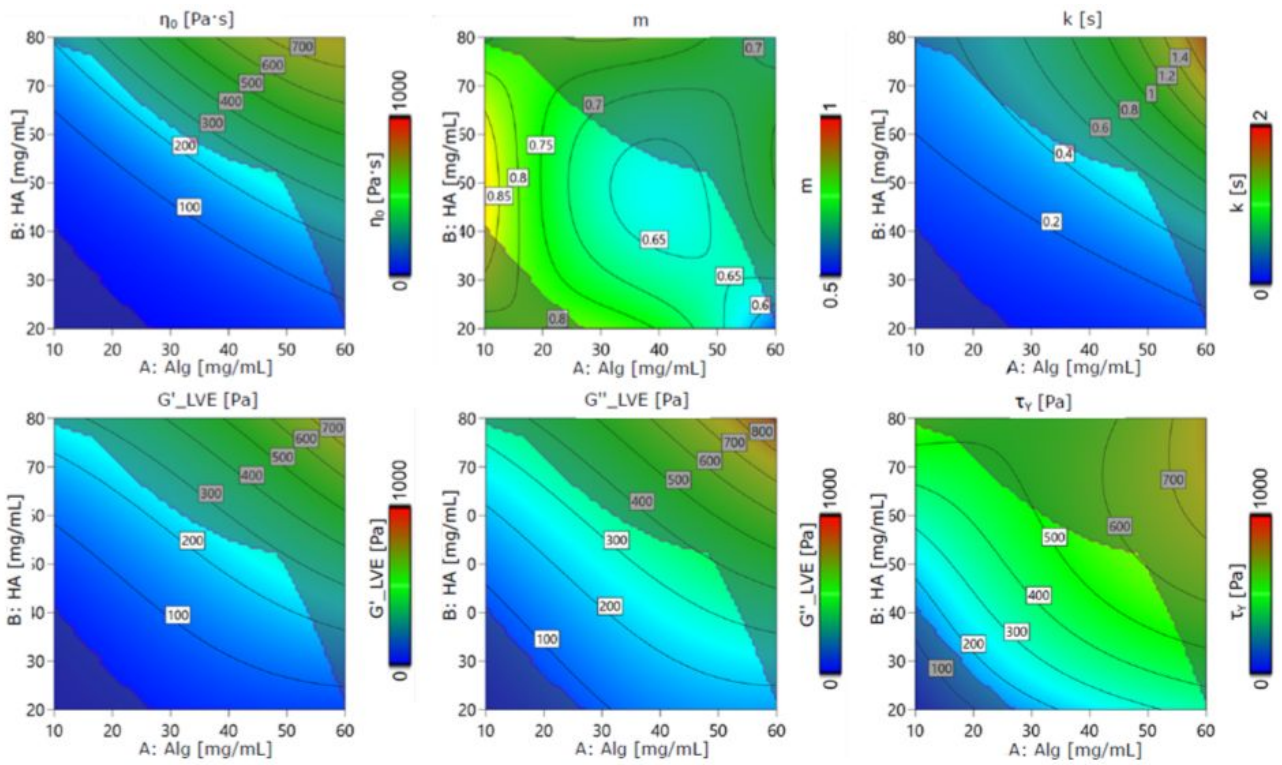

**Figure. S6** Contour plot of the model predicting the rheology within the printability bands in case of 55kPa of applied pressure.

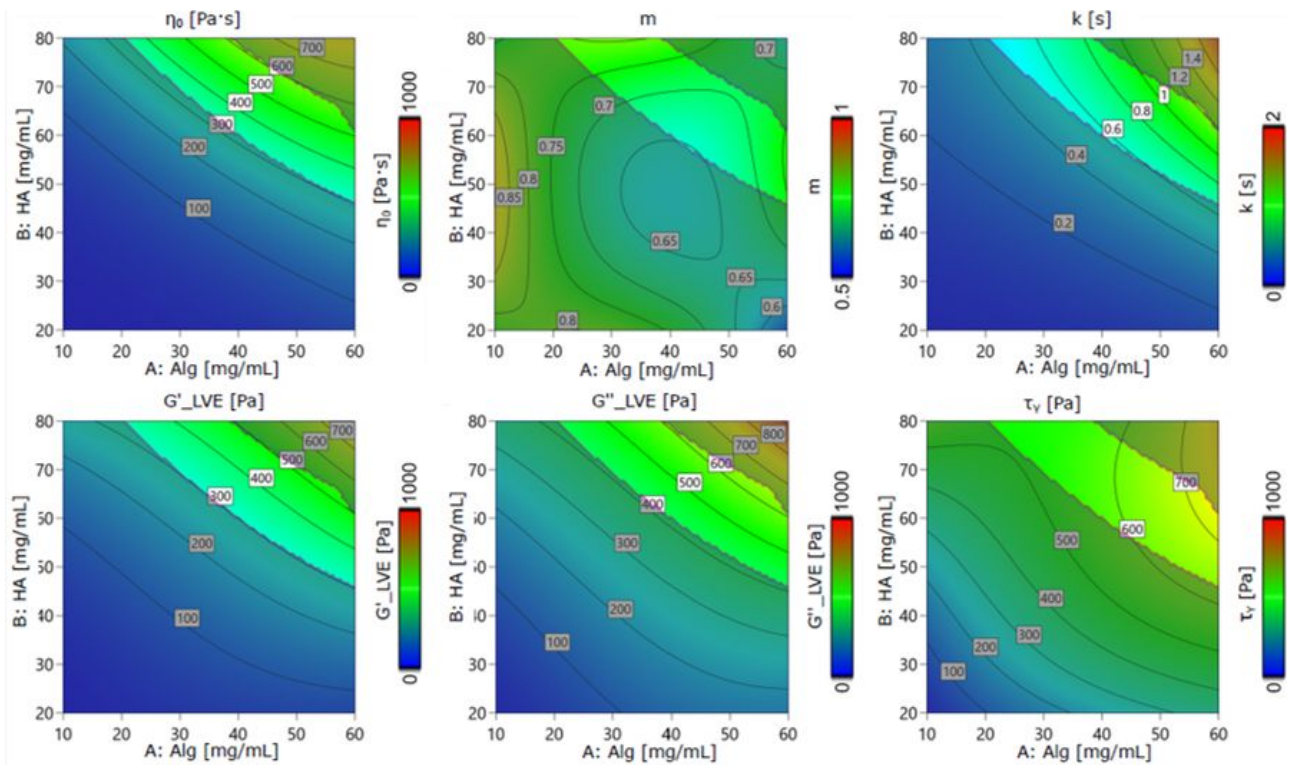

**Figure. S7** Contour plot of the model predicting the rheology within the printability bands in case of 107.5kPa of applied pressure.



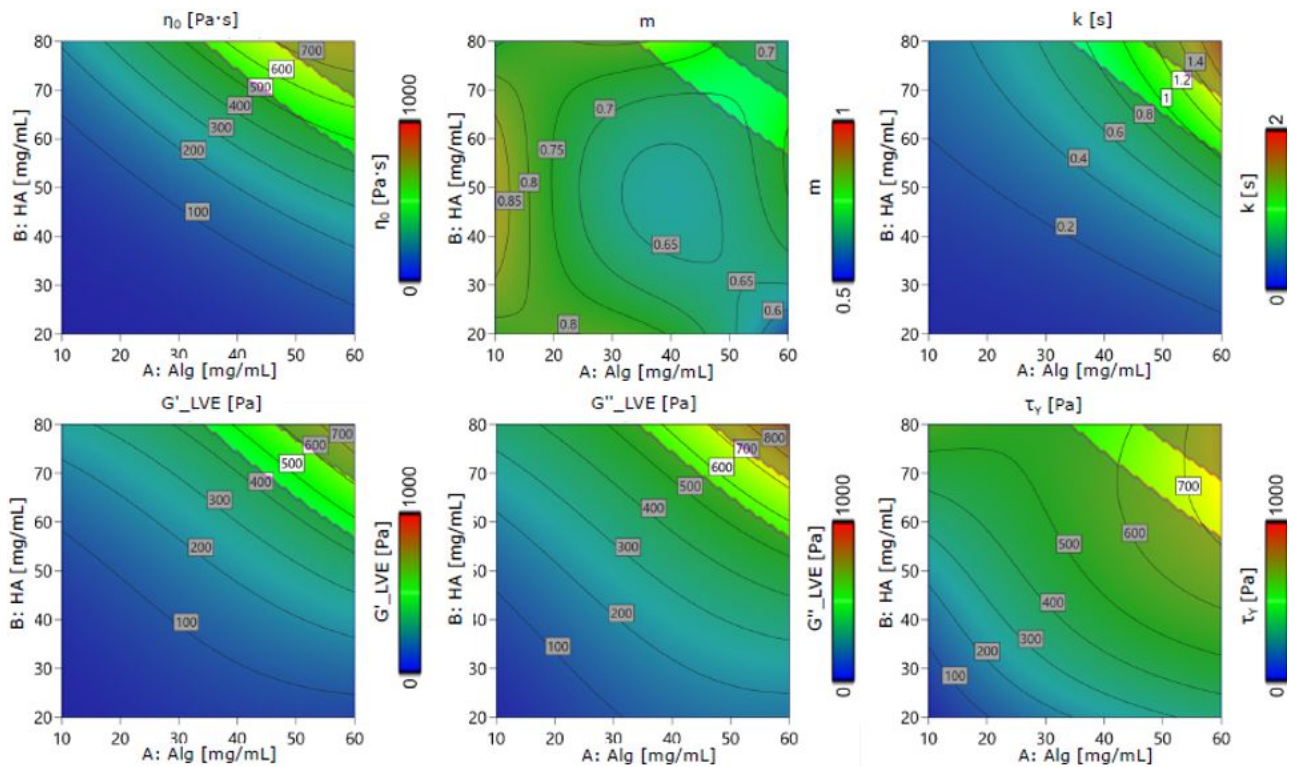

**Figure. S8** Contour plot of the model predicting the rheology within the printability bands in case of 160kPa of applied pressure.

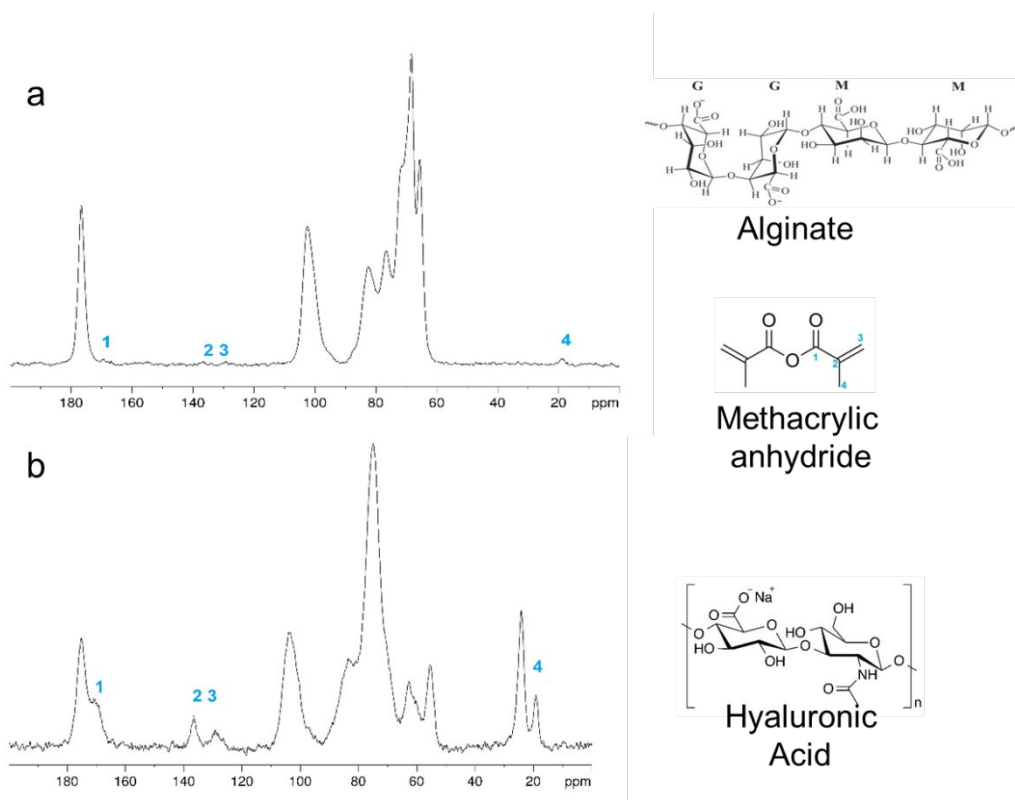

**Figure. S9**  $^{13}\text{C}$  CPMAS NMR spectra of a) AL-MA and b) HA-MA. The numbers refer to the anhydride in the scheme to the right. Solid state NMR analyses were carried out with a Bruker

Avance 400WB spectrometer. NMR spectra were acquired with cp pulse sequences under the following conditions:  $^{13}\text{C}$  frequency: 100.48 MHz, contact time 2000  $\mu\text{s}$ , decoupling length 6.3  $\mu\text{s}$ , recycle delay: 5s, 2k scans. Samples were packed in 4 mm zirconia rotors, which were spun at 9 kHz under air flow. Adamantane was used as an external secondary reference.

| $\delta$ (ppm) | 176 /<br>Area | 169 /<br>Area |
|----------------|---------------|---------------|
| AL-MA          | 100           | 1.1           |
| HA-MA          | 100           | 29.6          |

**Table. S4** The integrals of the two carbonyl belonging to the saccharides at about 176 ppm and the methacrylate at 169 ppm are taken into account to quantify the methacrylation degree. It should be mentioned that the  $^{13}\text{C}$  CPMAS experimental parameters were selected to obtain quantitative results. In the case of AL-MA the amount of methacrylate units can be also assessed by comparison between the integral of the 5 ring carbons and the area of the anhydride methyl at 19 ppm. Similarly, for HA-MA it is possible to better compare the integrals of the two methyls at 24 and 19 ppm due to hyaluronic acid and anhydride, respectively. Both evaluations confirm the results presented.

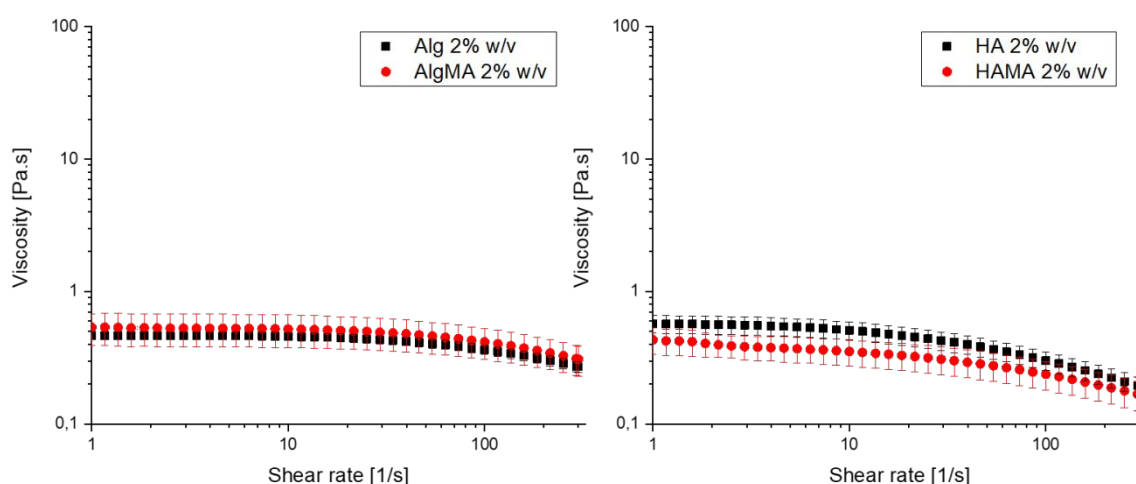

**Figure. S10** Viscosity measurement comparison of alginate and hyaluronic acid solutions 2% w/v and their methacrylated counterparts.

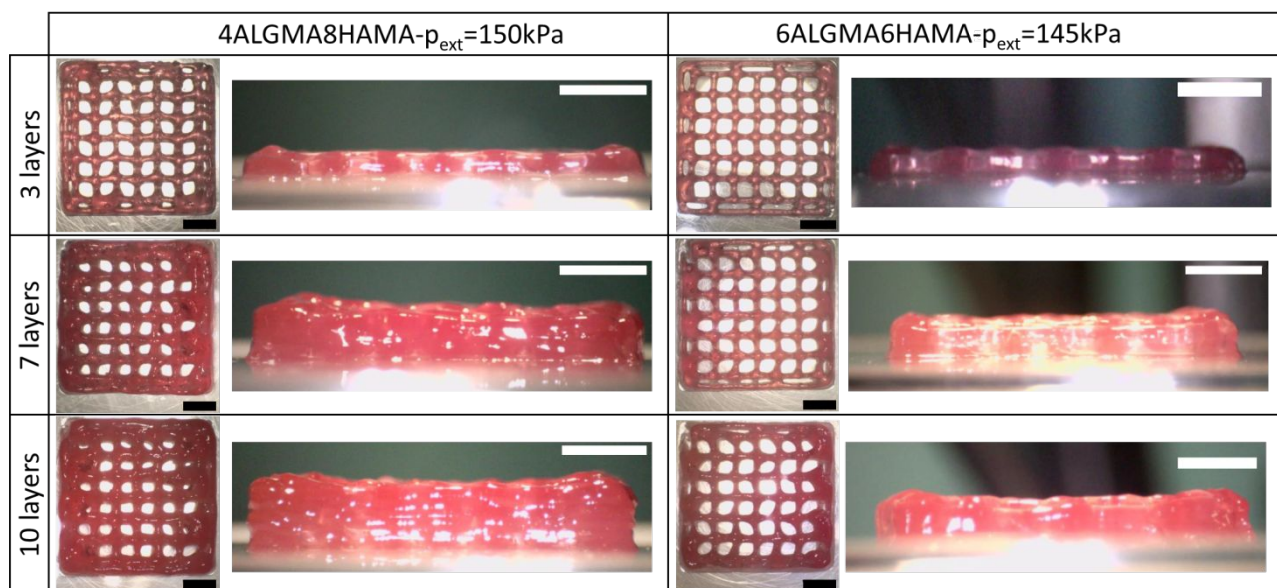

**Figure. S11** Pictures of some multilayered methacrylated blend grids with two different compositions and printing pressures, printed with 3, 7 and 10 layers. All the reference bars are 5mm.

|                                          |                          |
|------------------------------------------|--------------------------|
| <b>Source type</b>                       | BioX printer left module |
| <b>Wavelength</b>                        | 365nm                    |
| <b>Distance from source to construct</b> | 3cm                      |
| <b>Intensity</b>                         | 11.6 mW/cm <sup>2</sup>  |
| <b>Exposure time for each layer</b>      | 3s                       |

**Table. S5** Parameters for the photocrosslinking of the methacrylated multilayered constructs
